# Supplementary material
Source: HighWire-hosted journal article supplement (https://bmjopen.bmj.com/content/10/7/e035528)
Supplement: inline-supplementary-material-1 [file inline-supplementary-material-1.pdf]

## Appendix

Table A1. Baseline balance tests

|                                          | Treatment |        |        |     |        |        | Control |        |        | Balance |               |                |
|------------------------------------------|-----------|--------|--------|-----|--------|--------|---------|--------|--------|---------|---------------|----------------|
|                                          | T1        |        |        | T2  |        |        |         |        |        | T1 v C  | T2 v C        | T1 v T2        |
|                                          | N         | Mean   | SE     | N   | Mean   | SE     | N       | Mean   | SE     |         |               |                |
| <b>Panel A. Maternal characteristics</b> |           |        |        |     |        |        |         |        |        |         |               |                |
| Age (years)                              | 511       | 25.530 | (6.54) | 379 | 25.206 | (6.44) | 779     | 25.392 | (6.53) | 0.139   | -0.186        | 0.325          |
| Indigenous=1                             | 510       | 1.000  | (0.00) | 379 | 0.997  | (0.05) | 776     | 0.999  | (0.04) | 0.001   | -0.001        | 0.003          |
| Married/in partnership=1                 | 511       | 0.906  | (0.29) | 379 | 0.929  | (0.26) | 779     | 0.893  | (0.31) | 0.013   | <b>0.035*</b> | -0.023         |
| Pregnant=1                               | 511       | 0.429  | (0.50) | 379 | 0.422  | (0.49) | 779     | 0.404  | (0.49) | 0.024   | 0.018         | 0.006          |
| Can read=1                               | 511       | 0.834  | (0.37) | 379 | 0.823  | (0.38) | 779     | 0.778  | (0.42) | 0.056   | 0.045         | 0.010          |
| Can write=1                              | 426       | 0.911  | (0.29) | 312 | 0.904  | (0.30) | 606     | 0.926  | (0.26) | -0.015  | -0.022        | 0.007          |
| Works=1                                  | 509       | 0.098  | (0.30) | 373 | 0.110  | (0.31) | 776     | 0.097  | (0.30) | 0.002   | 0.013         | -0.012         |
| Primary education incomplete=1           | 511       | 0.440  | (0.50) | 379 | 0.449  | (0.50) | 779     | 0.453  | (0.50) | -0.013  | -0.005        | -0.008         |
| Primary education complete=1             | 511       | 0.458  | (0.50) | 379 | 0.446  | (0.50) | 779     | 0.420  | (0.49) | 0.038   | 0.026         | 0.012          |
| Secondary education complete=1           | 511       | 0.102  | (0.30) | 379 | 0.092  | (0.29) | 779     | 0.116  | (0.32) | -0.014  | -0.023        | 0.009          |
| Empowerment Index                        | 429       | 0.350  | (0.20) | 312 | 0.318  | (0.20) | 649     | 0.351  | (0.22) | -0.001  | -0.033        | <b>0.031**</b> |
| Rosenberg Score                          | 509       | 20.163 | (4.69) | 378 | 20.423 | (4.45) | 772     | 20.000 | (4.71) | 0.163   | 0.423         | -0.260         |
| Grit Score                               | 509       | 3.475  | (0.66) | 379 | 3.470  | (0.68) | 772     | 3.370  | (0.69) | 0.106   | 0.101         | 0.005          |
| Knowledge Index                          | 510       | 0.314  | (0.10) | 379 | 0.312  | (0.10) | 777     | 0.296  | (0.10) | 0.017   | 0.016         | 0.001          |

|                                          | Treatment |        |        |     |        |        | Control |        |        | Balance         |                |                |
|------------------------------------------|-----------|--------|--------|-----|--------|--------|---------|--------|--------|-----------------|----------------|----------------|
|                                          | T1        |        |        | T2  |        |        |         |        |        | T1 v C          | T2 v C         | T1 v T2        |
|                                          | N         | Mean   | SE     | N   | Mean   | SE     | N       | Mean   | SE     |                 |                |                |
| <b>Panel B. Paternal characteristics</b> |           |        |        |     |        |        |         |        |        |                 |                |                |
| Age (years)                              | 459       | 29.458 | (8.05) | 343 | 28.845 | (7.70) | 690     | 28.835 | (7.84) | 0.623           | 0.011          | 0.612          |
| Indigenous=1                             | 457       | 1.000  | (0.00) | 343 | 0.997  | (0.05) | 687     | 1.000  | (0.00) | 0.000           | -0.003         | 0.003          |
| Married/in partnership=1                 | 459       | 1.000  | (0.00) | 344 | 0.997  | (0.05) | 691     | 0.999  | (0.04) | 0.001           | -0.001         | 0.003          |
| Can read=1                               | 459       | 0.911  | (0.29) | 344 | 0.898  | (0.30) | 691     | 0.865  | (0.34) | 0.045           | 0.033          | 0.012          |
| Works=1                                  | 459       | 0.904  | (0.29) | 343 | 0.863  | (0.34) | 691     | 0.851  | (0.36) | <b>0.053*</b>   | 0.012          | <b>0.041**</b> |
| Primary education incomplete=1           | 458       | 0.319  | (0.47) | 344 | 0.366  | (0.48) | 691     | 0.386  | (0.49) | -0.068          | -0.020         | -0.048         |
| Primary education complete=1             | 458       | 0.555  | (0.50) | 344 | 0.488  | (0.50) | 691     | 0.488  | (0.50) | 0.067           | 0.001          | <b>0.066*</b>  |
| Secondary education complete=1           | 458       | 0.114  | (0.32) | 344 | 0.142  | (0.35) | 691     | 0.114  | (0.32) | -0.001          | 0.028          | -0.029         |
| <b>Panel C. Child characteristics</b>    |           |        |        |     |        |        |         |        |        |                 |                |                |
| Male=1                                   | 330       | 0.533  | (0.50) | 252 | 0.484  | (0.50) | 507     | 0.505  | (0.50) | 0.028           | -0.021         | 0.049          |
| Not yet born=1                           | 524       | 0.370  | (0.48) | 387 | 0.349  | (0.48) | 791     | 0.359  | (0.48) | 0.011           | -0.010         | 0.021          |
| Age (months) – including in utero        | 441       | 2.937  | (5.80) | 336 | 3.345  | (6.18) | 683     | 2.586  | (5.32) | 0.351           | 0.760          | -0.409         |
| Dad lives in house=1                     | 324       | 0.873  | (0.33) | 249 | 0.892  | (0.31) | 499     | 0.870  | (0.34) | 0.004           | 0.022          | -0.018         |
| <b>Panel D. Household composition</b>    |           |        |        |     |        |        |         |        |        |                 |                |                |
| Number of members                        | 500       | 5.856  | (2.87) | 370 | 5.908  | (2.74) | 758     | 5.871  | (2.86) | -0.015          | 0.037          | -0.052         |
| % males 0-5 years                        | 500       | 0.126  | (0.14) | 370 | 0.134  | (0.14) | 758     | 0.118  | (0.14) | 0.008           | <b>0.016*</b>  | -0.009         |
| % males 6-18 years                       | 500       | 0.106  | (0.14) | 370 | 0.112  | (0.14) | 758     | 0.103  | (0.13) | 0.003           | 0.009          | -0.005         |
| % males 19-49 years                      | 500       | 0.224  | (0.11) | 370 | 0.227  | (0.11) | 758     | 0.227  | (0.12) | -0.003          | -0.001         | -0.003         |
| % males > 50 years                       | 500       | 0.029  | (0.07) | 370 | 0.024  | (0.06) | 758     | 0.027  | (0.06) | 0.003           | -0.002         | 0.005          |
| % females 0-5 years                      | 500       | 0.122  | (0.14) | 370 | 0.116  | (0.13) | 758     | 0.119  | (0.14) | 0.003           | -0.003         | 0.006          |
| % females 6-18 years                     | 500       | 0.128  | (0.14) | 370 | 0.133  | (0.15) | 758     | 0.125  | (0.14) | 0.003           | 0.008          | -0.005         |
| % females 19-49 years                    | 500       | 0.237  | (0.12) | 370 | 0.225  | (0.11) | 758     | 0.243  | (0.12) | -0.007          | <b>-0.018*</b> | <b>0.012*</b>  |
| % females > 50 years                     | 500       | 0.023  | (0.06) | 370 | 0.023  | (0.06) | 758     | 0.030  | (0.07) | <b>-0.007**</b> | <b>-0.007*</b> | 0.000          |

|                                   | Treatment |          |           |     |          |           | Control |          |           | Balance |        |                |
|-----------------------------------|-----------|----------|-----------|-----|----------|-----------|---------|----------|-----------|---------|--------|----------------|
|                                   | T1        |          |           | T2  |          |           |         |          |           | T1 v C  | T2 v C | T1 v T2        |
|                                   | N         | Mean     | SE        | N   | Mean     | SE        | N       | Mean     | SE        |         |        |                |
| <b>Panel E. Income and assets</b> |           |          |           |     |          |           |         |          |           |         |        |                |
| Monthly income (Quetzales)        | 487       | 1886.139 | (1970.34) | 360 | 1909.180 | (1951.54) | 733     | 1918.174 | (2201.69) | -32.036 | -8.994 | -23.041        |
| Wealth index                      | 500       | -0.111   | (2.91)    | 370 | -0.217   | (2.75)    | 758     | 0.190    | (3.10)    | -0.300  | -0.407 | 0.106          |
| Number of rooms                   | 500       | 2.088    | (1.11)    | 370 | 2.070    | (1.17)    | 758     | 2.193    | (1.23)    | -0.105  | -0.122 | 0.018          |
| Number of bedrooms                | 500       | 1.434    | (1.06)    | 370 | 1.405    | (1.12)    | 758     | 1.455    | (1.15)    | -0.021  | -0.050 | 0.029          |
| Television=1                      | 500       | 0.488    | (0.50)    | 370 | 0.497    | (0.50)    | 758     | 0.516    | (0.50)    | -0.028  | -0.019 | -0.009         |
| Cable=1                           | 500       | 0.264    | (0.44)    | 370 | 0.297    | (0.46)    | 758     | 0.274    | (0.45)    | -0.010  | 0.023  | <b>-0.033*</b> |
| Radio=1                           | 500       | 0.376    | (0.48)    | 370 | 0.389    | (0.49)    | 758     | 0.413    | (0.49)    | -0.037  | -0.024 | -0.013         |
| Landline=1                        | 500       | 0.020    | (0.14)    | 370 | 0.019    | (0.14)    | 758     | 0.032    | (0.18)    | -0.012  | -0.013 | 0.001          |
| Cellphone=1                       | 500       | 0.876    | (0.33)    | 370 | 0.881    | (0.32)    | 758     | 0.856    | (0.35)    | 0.020   | 0.025  | -0.005         |
| Stove (gas or electric)=1         | 500       | 0.222    | (0.42)    | 370 | 0.203    | (0.40)    | 758     | 0.309    | (0.46)    | -0.087  | -0.106 | 0.019          |
| Refrigerator=1                    | 500       | 0.192    | (0.39)    | 370 | 0.203    | (0.40)    | 758     | 0.236    | (0.42)    | -0.044  | -0.033 | -0.011         |
| Washing machine=1                 | 500       | 0.028    | (0.17)    | 370 | 0.030    | (0.17)    | 758     | 0.030    | (0.17)    | -0.002  | -0.001 | -0.002         |
| Air conditioning=1                | 500       | 0.002    | (0.04)    | 370 | 0.000    | (0.00)    | 758     | 0.003    | (0.05)    | -0.001  | -0.003 | 0.002          |
| Sewing machine =1                 | 500       | 0.026    | (0.16)    | 370 | 0.024    | (0.15)    | 758     | 0.025    | (0.16)    | 0.001   | -0.001 | 0.002          |
| Computer or tablet=1              | 500       | 0.056    | (0.23)    | 370 | 0.038    | (0.19)    | 758     | 0.062    | (0.24)    | -0.006  | -0.024 | 0.018          |
| Car=1                             | 500       | 0.066    | (0.25)    | 370 | 0.054    | (0.23)    | 758     | 0.073    | (0.26)    | -0.007  | -0.019 | 0.012          |
| Motorcycle=1                      | 500       | 0.150    | (0.36)    | 370 | 0.154    | (0.36)    | 758     | 0.204    | (0.40)    | -0.054  | -0.050 | -0.004         |
| Bicycle=1                         | 500       | 0.126    | (0.33)    | 370 | 0.135    | (0.34)    | 758     | 0.169    | (0.37)    | -0.043  | -0.034 | -0.009         |
| Power plant or solar panels=1     | 500       | 0.056    | (0.23)    | 370 | 0.051    | (0.22)    | 758     | 0.083    | (0.28)    | -0.027  | -0.032 | 0.005          |

|                                           | Treatment |       |        |     |       |        | Control |       |        | Balance |        |                 |
|-------------------------------------------|-----------|-------|--------|-----|-------|--------|---------|-------|--------|---------|--------|-----------------|
|                                           | T1        |       |        | T2  |       |        |         |       |        | T1 v C  | T2 v C | T1 v T2         |
|                                           | N         | Mean  | SE     | N   | Mean  | SE     | N       | Mean  | SE     |         |        |                 |
| <b>Panel F. Household characteristics</b> |           |       |        |     |       |        |         |       |        |         |        |                 |
| <i>Type of home</i>                       |           |       |        |     |       |        |         |       |        |         |        |                 |
| House                                     | 500       | 0.984 | (0.13) | 370 | 0.973 | (0.16) | 758     | 0.953 | (0.21) | 0.031   | 0.020  | <b>0.011**</b>  |
| Other                                     | 500       | 0.016 | (0.13) | 370 | 0.027 | (0.16) | 758     | 0.047 | (0.21) | -0.031  | -0.020 | <b>-0.011**</b> |
| <i>Tenancy</i>                            |           |       |        |     |       |        |         |       |        |         |        |                 |
| Owned                                     | 500       | 0.742 | (0.44) | 370 | 0.762 | (0.43) | 758     | 0.736 | (0.44) | 0.006   | 0.026  | -0.020          |
| Rented                                    | 500       | 0.064 | (0.24) | 370 | 0.049 | (0.22) | 758     | 0.057 | (0.23) | 0.007   | -0.008 | 0.015           |
| Other (given/borrowed/squatting)          | 500       | 0.194 | (0.40) | 370 | 0.189 | (0.39) | 758     | 0.207 | (0.41) | -0.013  | -0.018 | 0.005           |
| <b>Panel G. Lighting and fuel</b>         |           |       |        |     |       |        |         |       |        |         |        |                 |
| <i>Type of lighting</i>                   |           |       |        |     |       |        |         |       |        |         |        |                 |
| Public electricity (DEORSA)               | 500       | 0.728 | (0.45) | 370 | 0.738 | (0.44) | 758     | 0.739 | (0.44) | -0.011  | -0.001 | -0.010          |
| Candles                                   | 500       | 0.136 | (0.34) | 370 | 0.127 | (0.33) | 758     | 0.102 | (0.30) | 0.034   | 0.025  | 0.009           |
| Solar panels                              | 500       | 0.062 | (0.24) | 370 | 0.073 | (0.26) | 758     | 0.096 | (0.30) | -0.034  | -0.023 | -0.011          |
| Other                                     | 500       | 0.074 | (0.26) | 370 | 0.062 | (0.24) | 758     | 0.063 | (0.24) | 0.011   | -0.001 | 0.012           |
| <i>Type of fuel</i>                       |           |       |        |     |       |        |         |       |        |         |        |                 |
| Propane gas                               | 500       | 0.182 | (0.39) | 370 | 0.143 | (0.35) | 758     | 0.247 | (0.43) | -0.065  | -0.103 | 0.039           |
| Wood                                      | 500       | 0.818 | (0.39) | 370 | 0.857 | (0.35) | 758     | 0.753 | (0.43) | 0.065   | 0.103  | -0.039          |

|                                      | Treatment |       |        |     |       |        | Control |       |        | Balance |        |         |
|--------------------------------------|-----------|-------|--------|-----|-------|--------|---------|-------|--------|---------|--------|---------|
|                                      | T1        |       |        | T2  |       |        |         |       |        | T1 v C  | T2 v C | T1 v T2 |
|                                      | N         | Mean  | SE     | N   | Mean  | SE     | N       | Mean  | SE     |         |        |         |
| <b>Panel H. Materials</b>            |           |       |        |     |       |        |         |       |        |         |        |         |
| <i>Exterior walls</i>                |           |       |        |     |       |        |         |       |        |         |        |         |
| Cinder block, brick, stone, concrete | 500       | 0.374 | (0.48) | 370 | 0.368 | (0.48) | 758     | 0.332 | (0.47) | 0.042   | 0.035  | 0.006   |
| Wood                                 | 500       | 0.266 | (0.44) | 370 | 0.265 | (0.44) | 758     | 0.204 | (0.40) | 0.062   | 0.060  | 0.001   |
| Adobe                                | 500       | 0.276 | (0.45) | 370 | 0.281 | (0.45) | 758     | 0.348 | (0.48) | -0.072  | -0.067 | -0.005  |
| Other                                | 500       | 0.078 | (0.27) | 370 | 0.078 | (0.27) | 758     | 0.104 | (0.31) | -0.026  | -0.026 | -0.000  |
| <i>Roof</i>                          |           |       |        |     |       |        |         |       |        |         |        |         |
| Clay tile                            | 500       | 0.172 | (0.38) | 370 | 0.178 | (0.38) | 758     | 0.234 | (0.42) | -0.062  | -0.055 | -0.006  |
| Metal                                | 500       | 0.768 | (0.42) | 370 | 0.743 | (0.44) | 758     | 0.679 | (0.47) | 0.089   | 0.064  | 0.025   |
| Other                                | 500       | 0.060 | (0.24) | 370 | 0.078 | (0.27) | 758     | 0.087 | (0.28) | -0.027  | -0.009 | -0.018  |
| <i>Floor</i>                         |           |       |        |     |       |        |         |       |        |         |        |         |
| Concrete, cement                     | 500       | 0.436 | (0.50) | 370 | 0.422 | (0.49) | 758     | 0.422 | (0.49) | 0.014   | -0.001 | 0.014   |
| Dirt                                 | 500       | 0.486 | (0.50) | 370 | 0.524 | (0.50) | 758     | 0.492 | (0.50) | -0.006  | 0.032  | -0.038  |
| Other                                | 500       | 0.078 | (0.27) | 370 | 0.054 | (0.23) | 758     | 0.086 | (0.28) | -0.008  | -0.032 | 0.024   |

|                                      | Treatment |       |        |     |       |        | Control |       |        | Balance          |                 |                  |
|--------------------------------------|-----------|-------|--------|-----|-------|--------|---------|-------|--------|------------------|-----------------|------------------|
|                                      | T1        |       |        | T2  |       |        |         |       |        | T1 v C           | T2 v C          | T1 v T2          |
|                                      | N         | Mean  | SE     | N   | Mean  | SE     | N       | Mean  | SE     |                  |                 |                  |
| <b>Panel I. Water and sanitation</b> |           |       |        |     |       |        |         |       |        |                  |                 |                  |
| <i>Bathroom type</i>                 |           |       |        |     |       |        |         |       |        |                  |                 |                  |
| Cesspit or latrine                   | 500       | 0.638 | (0.48) | 370 | 0.654 | (0.48) | 758     | 0.625 | (0.48) | 0.013            | 0.029           | -0.016           |
| Toilet connected to sewer            | 500       | 0.236 | (0.43) | 370 | 0.205 | (0.40) | 758     | 0.249 | (0.43) | -0.013           | -0.044          | <b>0.031**</b>   |
| Toilet connected to septic tank      | 500       | 0.088 | (0.28) | 370 | 0.114 | (0.32) | 758     | 0.087 | (0.28) | 0.001            | 0.026           | <b>-0.026**</b>  |
| No bathroom                          | 500       | 0.038 | (0.19) | 370 | 0.027 | (0.16) | 758     | 0.038 | (0.19) | -0.000           | -0.011          | 0.011            |
| <i>Bathroom use</i>                  |           |       |        |     |       |        |         |       |        |                  |                 |                  |
| Exclusive                            | 481       | 0.805 | (0.40) | 360 | 0.772 | (0.42) | 731     | 0.807 | (0.39) | -0.003           | -0.035          | 0.032            |
| Shared                               | 481       | 0.195 | (0.40) | 360 | 0.228 | (0.42) | 731     | 0.193 | (0.39) | 0.003            | 0.035           | -0.032           |
| <i>Trash disposal</i>                |           |       |        |     |       |        |         |       |        |                  |                 |                  |
| Public garbage truck                 | 500       | 0.166 | (0.37) | 370 | 0.146 | (0.35) | 758     | 0.175 | (0.38) | -0.009           | -0.030          | 0.020            |
| Burns                                | 500       | 0.636 | (0.48) | 370 | 0.622 | (0.49) | 758     | 0.619 | (0.49) | 0.017            | 0.003           | 0.014            |
| Buries                               | 500       | 0.088 | (0.28) | 370 | 0.111 | (0.31) | 758     | 0.078 | (0.27) | 0.010            | 0.033           | -0.023           |
| Backyard                             | 500       | 0.050 | (0.22) | 370 | 0.062 | (0.24) | 758     | 0.058 | (0.23) | -0.008           | 0.004           | -0.012           |
| Other                                | 500       | 0.060 | (0.24) | 370 | 0.059 | (0.24) | 758     | 0.070 | (0.26) | -0.010           | -0.010          | 0.001            |
| <i>Drinking water</i>                |           |       |        |     |       |        |         |       |        |                  |                 |                  |
| Piped water in household             | 500       | 0.612 | (0.49) | 370 | 0.600 | (0.49) | 758     | 0.554 | (0.50) | 0.058            | 0.046           | 0.012            |
| Piped water for community            | 500       | 0.202 | (0.40) | 370 | 0.208 | (0.41) | 758     | 0.193 | (0.39) | 0.009            | 0.015           | -0.006           |
| Well                                 | 500       | 0.042 | (0.20) | 370 | 0.057 | (0.23) | 758     | 0.082 | (0.27) | -0.040           | -0.025          | -0.015           |
| Spring                               | 500       | 0.056 | (0.23) | 370 | 0.046 | (0.21) | 758     | 0.071 | (0.26) | -0.015           | -0.025          | 0.010            |
| Purchases clean water                | 500       | 0.038 | (0.19) | 370 | 0.051 | (0.22) | 758     | 0.077 | (0.27) | -0.039           | -0.025          | -0.013           |
| Other                                | 500       | 0.050 | (0.22) | 370 | 0.038 | (0.19) | 758     | 0.024 | (0.15) | 0.026            | 0.014           | 0.012            |
| <i>Water treatment</i>               |           |       |        |     |       |        |         |       |        |                  |                 |                  |
| None                                 | 500       | 0.102 | (0.30) | 370 | 0.141 | (0.35) | 758     | 0.232 | (0.42) | <b>-0.130***</b> | <b>-0.092**</b> | <b>-0.039***</b> |
| Boils                                | 500       | 0.646 | (0.48) | 370 | 0.638 | (0.48) | 758     | 0.554 | (0.50) | 0.092            | 0.084           | 0.008            |
| Filters                              | 500       | 0.102 | (0.30) | 370 | 0.078 | (0.27) | 758     | 0.075 | (0.26) | 0.027            | 0.003           | <b>0.024*</b>    |
| Adds chlorine                        | 500       | 0.102 | (0.30) | 370 | 0.111 | (0.31) | 758     | 0.096 | (0.30) | 0.006            | 0.015           | -0.009           |
| Other                                | 500       | 0.048 | (0.21) | 370 | 0.032 | (0.18) | 758     | 0.042 | (0.20) | 0.006            | -0.010          | 0.016            |

Table A2. Knowledge Index – components and correct responses

| Components                                                | Responses                                       |
|-----------------------------------------------------------|-------------------------------------------------|
| Duration of exclusive breastfeeding                       | 1= 6 months                                     |
| Benefits of breast milk                                   | 1= Protects children from sickness              |
| Benefits of breast milk                                   | 1= Helps children grow                          |
| Benefits of breast milk                                   | 1= Has everything child needs in first 6 months |
| Benefits of breast milk                                   | 1= It's clean, safe, and convenient             |
| Benefits of breast milk                                   | 1= It's economical                              |
| Benefits of breast milk                                   | 1= It reduces medical costs                     |
| Benefits of breast milk                                   | 1= Due to medical advice                        |
| Frequency of breastfeeding for child under 6 months       | 1= Whenever they want                           |
| When can you give liquids to children under 6 months      | 1= Never                                        |
| Is it okay to keep breastfeeding when sick                | 1= Yes                                          |
| Is it okay to keep breastfeeding when studying or working | 1= Yes                                          |
| Strategies to use if mother is working                    | 1= Breastfeed before and after leaving          |
| Strategies to use if mother is working                    | 1= Breastfeed multiple times at night           |
| Strategies to use if mother is working                    | 1= Pump breast milk                             |
| Strategies to use if mother is working                    | 1= Store breast milk in the refrigerator        |
| Strategies to use if mother is working                    | 1= Store breast milk in the freezer             |
| Introduction of liquids                                   | 1= 6 months                                     |
| Introduction of solids                                    | 1= 6 months                                     |
| Can give food to children under 6 months if hungry        | 1= False                                        |
| Consistency of food 6-8 months                            | 1= Thick/mashed porridge                        |
| Method to know if consistency is adequate 6-8 months      | 1= If it doesn't easily fall off the spoon      |
| Children 6-8 months can drink sugary beverages            | 1= False                                        |
| Don't have to worry about variety of food at 6-8 months   | 1= False                                        |
| Frequency of meals 6-8 months                             | 1= 2-3                                          |
| Frequency of snacks 6-8 months                            | 1= 1-2                                          |
| Spoonfuls per meal                                        | 1= 2-3                                          |
| Quantity of food when child over 6 months is sick         | 1= More                                         |
| Quantity of liquids when child over 6 months is sick      | 1= More                                         |
| Quantity of breast milk when child over 6 months is sick  | 1= More                                         |
| Consistency of food 9-11 months                           | 1= Small pieces                                 |
| Other characteristics of food 9-11 months                 | 1= Easy to pick up and in small pieces          |
| Frequency of meals 9-11 months                            | 1= 3-4                                          |
| Frequency of snacks 9-11 months                           | 1= 1-2                                          |
| Spoonfuls per meal 9-11 months                            | 1= 6-7                                          |
| Recommended foods 9-11 months                             | 1= Breast milk                                  |
| Recommended foods 9-11 months                             | 1= Mashed beans                                 |
| Recommended foods 9-11 months                             | 1= Chicken with vegetables                      |
| You should breastfeed after 12 months                     | 1= Yes                                          |
| Duration of breastfeeding                                 | 1= 24 months                                    |
| Consistency of food 12-24 months                          | 1= Pieces                                       |
| Frequency of meals 12-24 months                           | 1= 3-4                                          |
| Frequency of snacks 12-24 months                          | 1= 1-2                                          |
| Spoonfuls per meal 12-24 months                           | 1= 8-9 or other                                 |
| Feeding practices                                         | 1= Feed with love                               |

|                   |                                                    |
|-------------------|----------------------------------------------------|
| Feeding practices | 1= Talk to them so they eat                        |
| Feeding practices | 1= Have patience                                   |
| Feeding practices | 1= Feed slowly                                     |
| Feeding practices | 1= Stay persistent so they try food multiple times |
| Feeding practices | 1= Feed them with family                           |
| Feeding practices | 1= Feed when free of stress and distraction        |
| Feeding practices | 1= Let them explore food with their hands          |
| Feeding practices | 1= Follow routines and schedules                   |
